# Supplementary material for: Thioacetamide-Induced Acute Liver Injury Increases Metformin Plasma Exposure by Downregulating Renal OCT2 and MATE1 Expression and Function
Source: MDPI journal article supplement (doi:10.3390/biomedicines11123314), 2023-12-15
Supplement: s1 [file s1]

## Supporting Information for

## ORIGINAL ARTICLE

**Table S1.** Primer sequences for qPCR.

| Gene             | Forward (5'-3')        | Reverse (5'-3')         |
|------------------|------------------------|-------------------------|
| Rat <i>OCT2</i>  | ATGAAATGGTCTGCCTGGTC   | ATGTCACACATGGAGGAGCA    |
| Rat <i>MATE1</i> | CATCGGGATCTCACTGATGTTC | GATGATTCCTGACCACAGACCAA |
| Rat ACTIN        | GCTATGTTGCCCTAGACTTCG  | GCCACAGGATTCCATACCCAG   |
